## RESEARCH ARTICLE

# Food insecurity and risk of cholera: A cross-sectional study and exploratory analysis of potential mediators

Ahmed D. Elnaïem<sup>1</sup>, Molly F. Franke<sup>2</sup>, Aaron Richterman<sup>3</sup>, Yodeline Guillaume<sup>4</sup>, Kenia Vissieres<sup>5</sup>, Gertrude Cene Augustin<sup>5</sup>, Ralph Ternier<sup>5</sup>, Louise C. Ivers<sup>2,4\*</sup>

**1** Department of Medicine, Division of Global Health Equity, Brigham and Women's Hospital, Boston, Massachusetts, United States of America, **2** Department of Global Health and Social Medicine, Harvard Medical School, Boston, Massachusetts, United States of America, **3** Division of Infectious Diseases, Hospital of the University of Pennsylvania, Philadelphia, Pennsylvania, United States of America, **4** Center for Global Health, Massachusetts General Hospital, Boston, Massachusetts, United States of America, **5** Zanmi Lasante, Partners In Health, Cange, Haiti

\* [LIVERS@mgh.harvard.edu](mailto:LIVERS@mgh.harvard.edu)

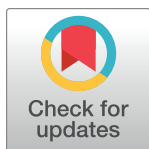

## OPEN ACCESS

**Citation:** Elnaïem AD, Franke MF, Richterman A, Guillaume Y, Vissieres K, Augustin GC, et al. (2023) Food insecurity and risk of cholera: A cross-sectional study and exploratory analysis of potential mediators. *PLoS Negl Trop Dis* 17(2): e0010574. <https://doi.org/10.1371/journal.pntd.0010574>

**Editor:** Husain Poonawala, Tufts Medical Center, UNITED STATES

**Received:** June 14, 2022

**Accepted:** January 23, 2023

**Published:** February 6, 2023

**Copyright:** © 2023 Elnaïem et al. This is an open access article distributed under the terms of the [Creative Commons Attribution License](https://creativecommons.org/licenses/by/4.0/), which permits unrestricted use, distribution, and reproduction in any medium, provided the original author and source are credited.

**Data Availability Statement:** All data are in the manuscript and/or supporting information files in "Replication Data for: Food insecurity and risk of cholera: A cross-sectional study and exploratory analysis of potential mediators", <https://doi.org/10.7910/DVN/JEEJVU>.

**Funding:** This work was supported by grants from the Bill and Melinda Gates Foundation (OPP1148213 to LCI) and the National Institutes of Health (NIAIDR0199243 to LCI). ADE was

## Abstract

### Background

Food insecurity has been independently associated with developing cholera and there is an inverse relationship between national food security and annual cholera incidence. However, the factors that mediate the risk of cholera among food insecure households remain largely unexplored.

### Methodology and principal findings

In a cross-sectional survey of rural households in Haiti, we explored the role of food behaviors (i.e., dietary choices and food-handling practices) as mediators of cholera risk among food-insecure families. We generated a series of multivariable regression models to test hypothesized associations between the severity of food insecurity (measured by the Household Hunger Scale), hygiene and food behaviors, and history of severe, medically-attended cholera.

Moderate household hunger (Adjusted Odds Ratio [AOR] 1.47, 95% Confidence Interval [CI] 1.05–2.04;  $p = 0.021$ ) and severe hunger (AOR 2.45, 95% CI 1.45–4.15;  $p = 0.001$ ) were positively associated with a history of severe, medically-attended cholera compared with little to no household hunger. Household hunger was positively associated with three behaviors: antacid use, consumption of leftover non-reheated food, and eating food and beverages prepared outside of the home (i.e., at a restaurant or from a vendor). Consumption of outside food items and antacid use were positively associated with a history of cholera.

### Conclusion

Our findings suggest that food behaviors may mediate the association between food insecurity and cholera and contribute to an understanding of how interventions could be designed to target food insecurity as part of cholera prevention and control.

supported by the Doris Duke Charitable Foundation through the Doris Duke International Clinical Research Fellows Program at Harvard Medical School. The funders had no role in study design, data collection and analysis, decision to publish, or preparation of the manuscript.

**Competing interests:** The authors have declared that no competing interests exist.

## Author summary

Food insecurity has been found to be a risk factor for cholera at the household and national level, however the mechanism through which food insecurity may increase the risk of cholera remains unknown.

In a large cross-sectional survey of 1072 households in rural Haiti, we observed a robust independent association between food insecurity—defined as a persistent lack of access to food in adequate quantity or quality and measured by the Household Hunger Scale—and reported history of severe, medically-attended cholera. The association was dose-dependent, with the odds of reported cholera increasing linearly with household food insecurity. Household food insecurity was associated with three high-risk behaviors: antacid use, consumption of leftover non-reheated food, and eating food and beverages prepared outside of the home. Two high-risk behaviors—including antacid use and consumption of food and beverages prepared outside of the home (i.e., at a restaurant or from a vendor)—were independent risk factors for cholera.

High-risk food practices may be one causal pathway by which food insecurity increases risk of developing cholera. In this study, we provide a framework for future longitudinal and qualitative studies to investigate whether interventions that target food insecurity could also reduce cholera risk among populations who face a high burden of both conditions.

## Introduction

Cholera and food insecurity are afflictions of inequity that sicken and kill impoverished and vulnerable populations. In 2018, an estimated 1.3 to 4.0 million cases and 21,000 to 143,000 deaths from cholera were reported worldwide [1] and globally cholera outbreaks have been increasing [2]. Meanwhile, in 2020, an estimated 2 billion people faced moderate or severe food insecurity [3]. In poor communities worldwide, close links between determinants of access to food, clean water, and basic sanitation give rise to significant overlaps in the distribution of food insecurity and cholera, particularly in humanitarian emergencies and conflict zones.

Food insecurity is a multidimensional phenomenon defined by an *uncertain or limited availability* of nutritionally adequate or safe food [4]. Over the past two decades, a growing body of literature has identified direct relationships between food insecurity and adverse health outcomes including in patients with metabolic disease [5–9], infectious diseases such as HIV and tuberculosis [10], cardiovascular disease [11,12], sleep disorders [13], and mental health conditions such as depression, anxiety, and psychological distress [14].

Because of the well-documented relationship between food insecurity and poor health outcomes in other diseases, and the frequent co-occurrence of cholera and food insecurity in impoverished settings, we have recently begun to evaluate the potential role of food security in the risk of developing cholera. We previously found that food insecurity was associated with a risk of developing cholera and a risk of death from cholera [15,16]. In a subsequent retrospective analysis of data from 30 countries, we demonstrated an inverse relationship between national food security, as measured by the Global Food Security Index, and the annual incidence of cholera [17].

Food insecurity may affect an individual's risk of acquiring *Vibrio cholerae* or of developing severe cholera when infected with the pathogen through several hypothesized pathways.

Firstly, malnutrition may impair the immune system, reducing gut barrier function and allowing *V. cholerae* to thrive, resulting in more severe symptomatic illness than might have otherwise occurred [18–20]. Secondly, decreased food availability may negatively impact food-related behavior, or lead to suboptimal food hygiene practices as an individual's risk-benefit estimation on what they eat, where they obtain food, or how they prepare food may be impacted when their attention is directed toward their most immediate food needs [4,21]. Gastrointestinal symptoms of hunger may result in use of medications or other remedies to alleviate discomfort. Lastly, poor mental health arising from food insecurity may undermine individual and community resilience to the economic losses and emotional strains caused by outbreaks of cholera [21]. Evidence evaluating the pathways by which these factors may contribute to an increased risk of symptomatic cholera among those who are food insecure is limited [22–25].

To address this knowledge gap, we assessed the potential role of household food behaviors, i.e., dietary choices and food-handling practices, as potential mediators of the relationship between food insecurity and cholera using a cross-sectional survey of rural Haitian households. In this study, we hypothesized that food insecurity would be positively associated with household behaviors—specifically antacid use and consumption of leftover non-reheated food, raw fruits or vegetables, raw or undercooked fish, or food and beverages prepared outside of the home—that would predispose individuals to develop severe, medically-attended cholera, and that these behaviors would be positively associated with severe cholera.

## Methods

### Ethics statement

Institutional Review Board approval was received from Partners Healthcare (Protocol #2018P001220) & Zanmi Lasante, Haiti (Protocol #128). All participants provided verbal informed consent to participate in the study.

### Selection and description of participants

We administered a cross-sectional survey to a random sample of 1072 households in the town of Mirebalais in Central Haiti between July and August, 2019. Households were randomly selected from data collected in a 2017 census that had enumerated 27,911 household and was conducted by our team as part of a public health program aimed at prevention and control of cholera [26]. A total of 1129 households were invited to participate in the study. Of these, we excluded a total of 57 households (9 declined to participate, 20 could not be contacted, and 28 did not reside permanently in the study's catchment area of Mirebalais).

A household was defined as an individual or group of related or unrelated individuals that slept at least half the week under the same roof, and shared resources such as food or cost of living expenses. Respondents were primarily adult heads of the household who were eighteen years or older and provided written informed consent. If the head of a household was unavailable, we surveyed another adult member of the household who could answer the survey questions about the household. After the interview, and with consent of the respondent, the study worker observed water, sanitation, and hygiene facilities at the household. Survey instruments were translated, and back-translated by bilingual research team members in English and Haitian Creole and had previously been extensively field-tested in the study population in central Haiti [16,27].

The survey was comprised of questions on household demographics, livelihood, assets, knowledge of and practices relating to cholera transmission, diet, medication use, and food-handling practices over the week and month prior to the interview. Household food insecurity

was measured using the Household Hunger Scale (HHS), a cross-culturally validated indicator consisting of three items drawn from the Household Food Insecurity Access Scale [28]. Households were classified into three categories based on established thresholds: little to no hunger, moderate hunger, and severe hunger in the household. A history of severe, medically attended cholera was obtained by self-report through two questions a) "Have you had diarrhea requiring you to stay overnight in a cholera treatment center or hospital since 2010?", and b) "Has anyone in your household (besides you) ever spent the night in a cholera treatment unit?". We asked respondents if they had been vaccinated against cholera, and if yes, requested to confirm this by reviewing a vaccination card. We estimated household poverty status using the Simple Poverty Scorecard—a validated poverty assessment tool specific to Haiti based on 11 indicators [29]. The scorecard generates a numeric poverty score (continuous variable) and estimates the likelihood of consumption below a poverty line (about \$1/day)—a lower score indicates higher relative poverty.

### Statistical analysis and causal framework

We first constructed a directed acyclic graph, based on published risk factors for cholera and biological plausibility, to guide our exploratory analysis and illustrate our hypothesized causal framework (Fig 1). We used logistic regression models to assess the relationship between household food insecurity and history of cholera. We generated an initial univariate model to calculate the crude unadjusted odds ratio (OR) with a 95% confidence interval (CI) between household hunger—the Household Hunger Scale was modeled as moderate and severe food insecurity versus little to none [28]—and history of severe, medically-attended cholera in the household. We then performed multivariable analyses to calculate an adjusted odds ratio (AOR) and 95% CI. In a secondary analysis, we modeled linear categories of household hunger (none, mild, moderate, severe) against medically-attended cholera and performed a log-likelihood ratio test to assess whether this linear categorization fit the data best.

We selected confounders based on our causal framework, prior publications of risk factors for cholera, and observed associations in our data. These included: poverty score, single marital status (head of household), cholera vaccination status, improved household water source, money spent on water (0, 0–15, 15–30, and >30 Haitian gourdes), distance to a water source (<15 min, 15–30 min, 30–45min, 45 min– 1 hour, and >1 hour) and latrine use [16,27,30,31]. We treated prior cholera vaccination and variables related to knowledge of handwashing as confounders of cholera in respondents. We based this decision on evidence from a previous longitudinal study conducted in Haiti that demonstrated that a cholera vaccination campaign was associated with increased handwashing knowledge and practice [31].

To interrogate the mediating effects of our hypothesized food behavior pathway, we utilized a two-step approach using logistic regression models. These models identified whether food insecurity was associated with specific high-risk behaviors in a household, and whether these behaviors were associated with cholera. First, we used multivariate regression models to estimate the association between food insecurity and specific behaviors. We considered five variables: consumption of leftover unheated food, raw fruits/vegetables, raw or undercooked fish, foods prepared outside the home, and antacid use over the prior week. We ran separate multivariable regression models, with each of the five food behavior variables as the dependent variable, household food insecurity as the independent variable, and the following confounders based on our causal framework and observed associations in the data: poverty score, single marital status, prior cholera vaccination, and knowledge of handwashing.

We then used multivariate regression models to assess the association between specific food behavior variables and history of household cholera. We adjusted for the same cholera risk

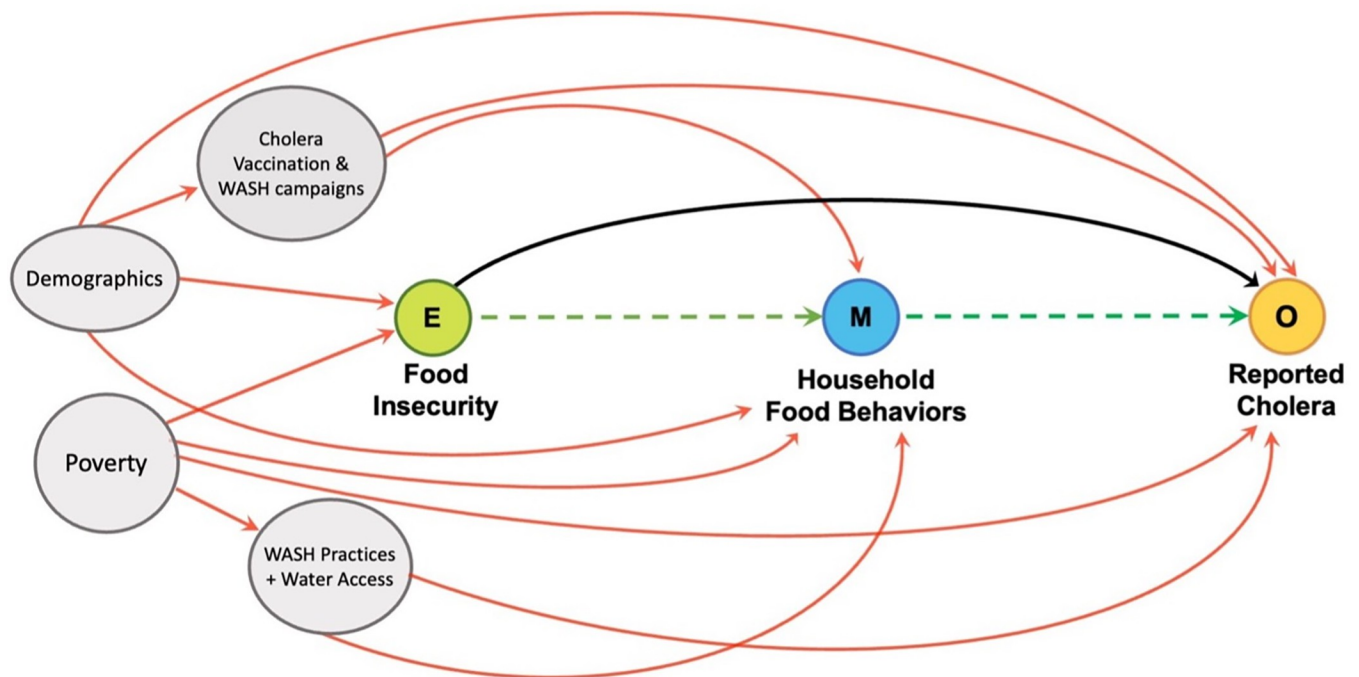

**Fig 1. Directed acyclic graph illustrating hypothesized relationship pathways.** Exposure is shown in green, mediating food behaviors in light blue, confounders in grey, and outcome in yellow. The indirect effect of food insecurity occurring through mediating household food behaviors is shown in green (dashed line). The direct effect of food insecurity on cholera is shown in black, and that of confounders in red.

<https://doi.org/10.1371/journal.pntd.0010574.g001>

factors included in the overall model estimating the association between food insecurity and cholera. To evaluate for multicollinearity in multivariate models, we calculated a variance inflation factor among covariates for each model—a factor greater than 2.50 was deemed indicative of multicollinearity.

There were missing data for only two variables, presence of a household latrine and covered water storage vessel, both of which were collected via observation of household WASH infrastructure. We used the missing indicator method to account for missingness in these two variables.

All quantitative analyses were performed using R Studio version 1.2.1335 for Mac with R version 3.6.1 for Mac.

## Results

A total of 1072 households, with a median size of 5 individuals (Interquartile Range 3–6), consented to participate in the survey (Table 1). Among all respondents, 52% were female, 60% worked primarily in agriculture, 42% never attended school, and 27% were single-parent heads of household. Approximately one-third of households ( $n = 343$ ) reported at least one instance of severe, medically-attended cholera. Most households (64.4%) experienced either moderate or severe levels of household hunger.

The distribution of socioeconomic characteristics, food behaviors, and WASH knowledge and reported practices varied significantly by the severity of household hunger (Table 1). In the week before the interview, moderately and severely hungry households were more likely to have consumed food or beverages prepared outside and been unable to reheat their food. Households with severe hunger reported more frequent use of antacids (66% vs. 43% in moderate, and 46% in little to no hunger;  $p < 0.0001$ ) and were least likely to report always treating

**Table 1. Household characteristics, dietary, food, and hygiene practices and knowledge of cholera in a cross-sectional household survey of Mirebalais, Haiti 2019 (N = 1072).**

|                                                                                |                                                    | Little to no Hunger **<br>N = 382 |     | Moderate Hunger **<br>N = 598 |     | Severe Hunger **<br>N = 92 |     |
|--------------------------------------------------------------------------------|----------------------------------------------------|-----------------------------------|-----|-------------------------------|-----|----------------------------|-----|
|                                                                                |                                                    | n                                 | %   | n                             | %   | n                          | %   |
| <b>Household Characteristics</b>                                               |                                                    |                                   |     |                               |     |                            |     |
| Household size [median (25 <sup>th</sup> -75 <sup>th</sup> percentile)]        |                                                    | 4 (3–6)                           |     | 5 (3–6)                       |     | 5 (4–7)                    |     |
| Number of children < 5 years old                                               |                                                    | 108                               | 28% | 213                           | 36% | 42                         | 46% |
| Single marital status (head of household)                                      |                                                    | 120                               | 31% | 203                           | 34% | 34                         | 37% |
| Poverty score [median (standard deviation)]                                    |                                                    | 48 (15.9)                         |     | 40 (15.1)                     |     | 31 (14)                    |     |
| Likelihood of consumption below national poverty line [27]                     |                                                    | 44.8%                             |     | 62.7%                         |     | 83.6%                      |     |
| Household history of severe, medically-attended cholera                        |                                                    | 85                                | 22% | 211                           | 35% | 47                         | 51% |
| <b>Dietary and Other Intake Practices *</b>                                    |                                                    |                                   |     |                               |     |                            |     |
| Antacid use                                                                    |                                                    | 174                               | 46% | 258                           | 43% | 61                         | 66% |
| Family was unable to reheat leftover food before eating                        |                                                    | 78                                | 20% | 121                           | 20% | 43                         | 47% |
| Consumed food/beverage prepared outside of the home                            |                                                    | 121                               | 32% | 280                           | 47% | 60                         | 65% |
| Source of procured item(s)                                                     | Family/friend's house                              | 48                                | 40% | 162                           | 58% | 46                         | 77% |
|                                                                                | Restaurant                                         |                                   | 29% | 68                            | 24% | 6                          | 10% |
|                                                                                | Marketplace                                        | 37                                | 31% | 99                            | 35% | 32                         | 53% |
| Dietary composition and medication use                                         | Raw fruits and vegetables                          | 210                               | 55% | 271                           | 45% | 40                         | 43% |
|                                                                                | Raw or undercooked fish                            | 11                                | 3%  | 17                            | 3%  | 5                          | 5%  |
|                                                                                | Almost daily fish or seafood consumption           | 27                                | 38% | 12                            | 55% | 3                          | 73% |
|                                                                                | Leftover unheated rice                             | 71                                | 19% | 124                           | 21% | 48                         | 52% |
|                                                                                | Beverage with ice obtained outside of household    | 288                               | 75% | 407                           | 68% | 76                         | 83% |
| <b>Water, Sanitation and Hygiene Knowledge and Reported Practices</b>          |                                                    |                                   |     |                               |     |                            |     |
| Utilization of an improved household water source <sup>†</sup>                 |                                                    | 190                               | 50% | 230                           | 38% | 30                         | 33% |
| Water from usual source was unavailable at least 1 whole day in the past month |                                                    | 153                               | 40% | 326                           | 55% | 44                         | 48% |
| Always treats household water                                                  |                                                    | 272                               | 71% | 247                           | 41% | 30                         | 33% |
| Reason for not always treating water                                           | Too expensive                                      | 4                                 | 1%  | 54                            | 15% | 0                          | 0%  |
|                                                                                | We don't have what we need to treat                | 54                                | 49% | 208                           | 59% | 46                         | 74% |
|                                                                                | Hard to get what we need to treat                  | 27                                | 25% | 114                           | 32% | 35                         | 56% |
| Time to fetch water and return by foot                                         | <15 min                                            | 204                               | 53% | 234                           | 39% | 40                         | 43% |
|                                                                                | 15–29 min                                          | 69                                | 18% | 128                           | 21% | 24                         | 26% |
|                                                                                | 30–59 min                                          | 58                                | 15% | 160                           | 27% | 16                         | 17% |
|                                                                                | 1 hour +                                           | 51                                | 13% | 76                            | 13% | 12                         | 13% |
| Money spent daily on water <sup>‡</sup>                                        | None                                               | 192                               | 50% | 440                           | 74% | 73                         | 79% |
|                                                                                | 0–30 gourdes                                       | 119                               | 31% | 84                            | 14% | 9                          | 10% |
|                                                                                | > 30 gourdes                                       | 71                                | 19% | 74                            | 12% | 10                         | 11% |
| Washes hands with soap and water > = 4 times daily                             |                                                    | 261                               | 68% | 280                           | 47% | 68                         | 74% |
| Soap always available in the home                                              |                                                    | 241                               | 63% | 206                           | 34% | 29                         | 32% |
| Offers this example of when hand washing is appropriate                        | After the toilet                                   | 262                               | 69% | 476                           | 80% | 77                         | 84% |
|                                                                                | Before eating                                      | 332                               | 87% | 517                           | 86% | 78                         | 85% |
|                                                                                | Before preparing food                              | 166                               | 43% | 170                           | 28% | 22                         | 24% |
|                                                                                | After touching things like money, telephones, etc. | 147                               | 38% | 119                           | 20% | 30                         | 33% |
|                                                                                | After handling a person with vomiting or diarrhea  | 71                                | 19% | 82                            | 14% | 9                          | 10% |
| Washes hands with soap and water > = 4 times daily                             |                                                    | 261                               | 68% | 280                           | 47% | 68                         | 74% |
| Soap always available in the home                                              |                                                    | 241                               | 63% | 206                           | 34% | 29                         | 32% |
| Use of covered water storage vessel <sup>††</sup>                              |                                                    | 204                               | 85% | 380                           | 81% | 61                         | 79% |

(Continued)



Table 1. (Continued)

|                                    |                                     | Little to no Hunger **<br>N = 382 |     | Moderate Hunger **<br>N = 598 |     | Severe Hunger **<br>N = 92 |     |
|------------------------------------|-------------------------------------|-----------------------------------|-----|-------------------------------|-----|----------------------------|-----|
|                                    |                                     | n                                 | %   | n                             | %   | n                          | %   |
| Household toilet system †††        | Flushing toilet                     | 48                                | 17% | 13                            | 3%  | 3                          | 4%  |
|                                    | Improved pit latrine                | 106                               | 38% | 120                           | 25% | 9                          | 12% |
|                                    | Unimproved pit latrine              | 112                               | 40% | 268                           | 56% | 53                         | 73% |
|                                    | Open area or garden                 | 10                                | 4%  | 60                            | 13% | 7                          | 10% |
|                                    | Composting toilet or bucket         | 4                                 | 1%  | 14                            | 3%  | 1                          | 1%  |
| Opening of water storage vessel †† | Narrow-mouthed (hand cannot fit in) | 125                               | 52% | 163                           | 35% | 30                         | 39% |
|                                    | Wide-mouthed (hand can fit in)      | 116                               | 48% | 309                           | 66% | 47                         | 61% |

\* Primary survey respondents (head of household) were asked about consumption over the prior week.

\*\* Household Hunger Scale scored as: little to no hunger in the household (score 0–1), moderate hunger in the household (score 2–3), or severe hunger in the household (score 4–6).

† Improved water sources were defined by Joint Monitoring Programme for Water Supply and Sanitation (JMP) standards and included: piped household water, protected wells or springs, bottled water, and collected rainwater [32].

# At the time of the study: \$1 USD = G 94.1376; 30 gourdes was approximately \$0.32 USD.

†† Missing water storage vessel observations exist for 282 households.

††† Missing household toilet system observations for 244 household.

<https://doi.org/10.1371/journal.pntd.0010574.t001>

their water (33%,  $p < 0.0001$ ). Households with moderate and severe hunger were less likely to spend money on water ( $p < 0.0001$ ), collect from an improved water source ( $p = 0.0003$ ), or travel less than 15 minutes to fetch water and return ( $p < 0.0001$ ). These households were also more likely to store water in a wide-mouthed container in which a hand could fit (66% for moderate; 61% for severe) compared to those with little to no hunger (48%).

## Association of food insecurity and cholera

Univariate analysis demonstrated a significant association between moderate (OR 1.91, 95% CI 1.42–2.56;  $p < 0.001$ ) and severe (OR 3.65, 95% CI 2.27–5.88;  $p < 0.001$ ) household hunger and history of cholera relative to little to no household hunger (Table 2). Multivariable analysis including hypothesized confounders yielded a similar, although attenuated, association for moderate (AOR 1.47, 95% CI 1.05–2.04;  $p = 0.021$ ) and severe (AOR 2.45, 95% CI 1.45–4.15;  $p = 0.001$ ) hunger in the household.

**Table 2. Unadjusted univariate and adjusted multivariable associations between household food insecurity and history of severe, medically-attended cholera in a cross-sectional household survey of Mirebalais, Haiti 2019 (N = 1072).**

|                     | Unadjusted Univariate Model |           |         | Adjusted Multivariable Model <sup>a</sup> |           |         |
|---------------------|-----------------------------|-----------|---------|-------------------------------------------|-----------|---------|
|                     | Odds ratio                  | 95% CI    | p-value | Odds ratio                                | 95% CI    | p-value |
| Little to no hunger | ref                         |           |         | ref                                       |           |         |
| Moderate hunger     | 1.91                        | 1.42–2.56 | <0.001  | 1.47                                      | 1.05–2.04 | 0.022   |
| Severe hunger       | 3.65                        | 2.27–5.88 | <0.001  | 2.45                                      | 1.45–4.15 | 0.006   |

(a) covariates include poverty score, single marital status, vaccination, improved water source, household latrine, covered water storage vessel, money spent daily on water, distance to a water source, and handwashing knowledge.

<https://doi.org/10.1371/journal.pntd.0010574.t002>

Table 3. Adjusted associations between household food insecurity and behaviors in a cross-sectional study of 1072 households in Mirebalais, Haiti, 2019.

| High-Risk Behavior <sup>a*</sup> | Little to no Hunger |        |         | Moderate Hunger |           |         | Severe Hunger |           |         |
|----------------------------------|---------------------|--------|---------|-----------------|-----------|---------|---------------|-----------|---------|
|                                  | AOR                 | 95% CI | p-value | AOR             | 95% CI    | p-value | AOR           | 95% CI    | p-value |
| Antacid use                      | ref                 |        |         | 0.95            | 0.72–1.25 | 0.7041  | 2.51          | 1.52–4.19 | 0.0004  |
| Raw fruits/vegetables            | ref                 |        |         | 0.69            | 0.52–0.92 | 0.0107  | 0.72          | 0.43–1.17 | 0.1868  |
| Undercooked fish                 | ref                 |        |         | 1.13            | 0.51–2.64 | 0.7610  | 2.48          | 0.71–7.76 | 0.1290  |
| Unable to reheat food            | ref                 |        |         | 1.10            | 0.79–1.56 | 0.5569  | 4.35          | 2.57–7.38 | <0.0001 |
| Consumes outside foods           | ref                 |        |         | 1.92            | 1.45–2.57 | <0.0001 | 4.32          | 2.61–7.28 | <0.0001 |

(a) Covariates: poverty score, single marital status, cholera vaccination, and knowledge of handwashing.

\* Consumed over the prior week

<https://doi.org/10.1371/journal.pntd.0010574.t003>

The relationship between household hunger and reported cholera was linear (likelihood ratio p-value = 0.9997): we observed a 40% increase in the odds of cholera with each increase in household food insecurity category (AOR 1.53, 95% CI 1.06–1.84; p = 0.0006).

### Household food insecurity as a predictor of high-risk behaviors

Household food insecurity was positively associated with three high-risk behaviors: consumption of food or beverages prepared outside of the home (moderate: AOR 1.92, 95 CI 1.45–2.5, p<0.0001; severe: AOR 4.32, 95 CI 2.61–7.28, p<0.0001), antacid use (severe: AOR 2.51, 95 CI 1.52–4.19; p = 0.0004), and consumption of leftover non-reheated food (severe: AOR 4.35, 95 CI 2.57–7.38, p<0.0001) (Table 3).

### Association of household behaviors and cholera

Fig 2 reports the associations between high-risk household behaviors and history of severe, medically-attended cholera. In adjusted analyses, we found an independent association

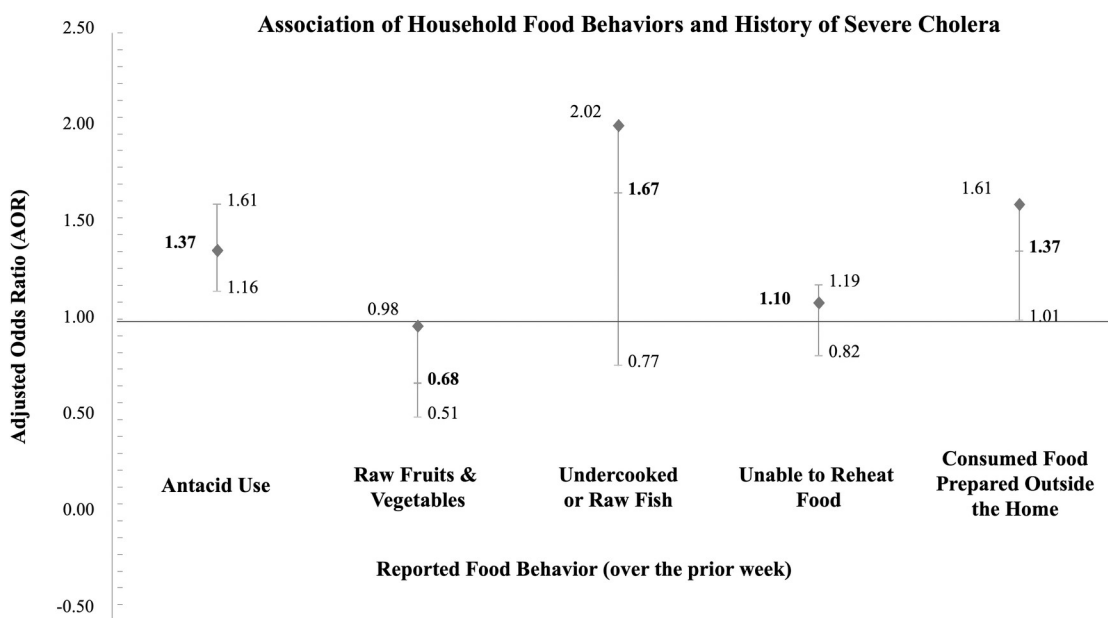

Fig 2. Adjusted associations of high-risk behaviors and history of severe medically-attended cholera in a cross-sectional study in Mirebalais, Haiti 2019 (N = 1072).

<https://doi.org/10.1371/journal.pntd.0010574.g002>



between household history of cholera and consumption of outside food (AOR 1.61; 95% CI 1.16–2.86  $p = 0.046$ ) and antacid use (AOR 1.34; 95% CI 1.06–1.16,  $p = 0.00472$ ) over the prior week. Consumption of raw fruits and vegetables was protective of household history of severe medically-attended cholera (AOR 0.68, 95% CI 0.51–0.98,  $p = 0.0483$ ).

## Discussion

In this cross-sectional study of 1072 households in central Haiti, we found a positive association between food insecurity and self-reported severe medically-attended cholera. We provide evidence that specific, high-risk behaviors serve as potential mediators of this association. Our findings illuminate one possible causal pathway through which food insecurity may predispose individuals to infection with the causative organism of cholera; in doing so, our findings have important implications for cholera prediction, response and control strategies [15,17].

We found that households with moderate and severe food insecurity were more likely to report high-risk behaviors for cholera. These included more frequent antacid use, consumption of food prepared outside the home, and eating of unheated leftover food items. Two of these behaviors—antacid use and consumption of food prepared outside the home—were also risk factors for cholera. A third risk factor, consumption of undercooked fish, was marginally associated with both food insecurity and cholera. These findings are consistent with a prior systematic review and metaanalysis which identified all three behaviors as risk factors for cholera [30]. These behaviors likely increase the risk of infection with cholera through more frequent household contact with contaminated foods and beverages.

In both high- and low-income contexts, hunger has been shown to lead to high-risk food handling practices. One study found that individuals experiencing food insecurity in the U.S. (New Jersey) needed to make pressured choices while scavenging for meals, which resulted in the consumption of contaminated food [33]. For example, participants reported consuming food left over by others as well as food items that required removal of spoiled areas with slime, mold, or insects [33]. Coping strategies are also context-specific and influenced by environmental, socioeconomic, and cultural factors [34]. However, consistent themes emerge across studies as insecure access to food has been tied to alterations in the quantity and types of foods consumed, nonfood spending allocations (e.g., reductions in medical spending), and overall behavioral patterns (e.g., forms of employment which may increase risks for sexually transmitted infections) [34–38]. Qualitative research into informal coping strategies has identified specific examples to include: stretching and substitution techniques, such as using water in place of milk in breakfast cereals; intake of expired and nearly expired foods; reductions in meal size, diversity, and frequency; transitioning to less expensive foods; and making one large pot of food to consume for several days [34–38]. In a study from Mali, the inability to afford cooking fuel for reheating and cooking was identified as risk factor for cholera as it increased the likelihood of eating cold, contaminated foods [23].

The use of antacids is a well-established risk factor for developing cholera after exposure to *V. cholerae* [39]. It has been reported in several contexts that individuals who are chronically hungry may also experience chronic gastrointestinal complaints as a result of food insecurity [40–42]. Medications that suppress gastric acidity are readily available at low cost and offer utility in treating a range of symptoms, leaving antacids as a plausible choice in response to gastrointestinal complaints among those who are food insecure. High rates of dyspepsia and infection with *Helicobacter pylori* have been reported in Haiti [43], as well as evidence of antibiotics, H2 receptor antagonists, and antacids being readily dispensed for their treatment [44,45].

A limitation of our exploratory study is its cross-sectional design that precludes discernment of temporality. For instance, it is plausible that a household's experience of cholera may subsequently increase their risk of food insecurity through costs associated with hospitalization, loss of income, and funerals [46,47]. While we cannot exclude the possibility that food insecurity occurred as a consequence of cholera infection, it is unlikely since high levels of food insecurity existed in Haiti well before the cholera epidemic began and has historically been driven by high food and fuel prices, droughts, and socio-political instability [3]. Moreover, it is unlikely that cholera would directly lead to the high-risk household food behaviors we evaluated, independently of household hunger. Regardless, the potential mediating role of food behaviors in increasing cholera risk among individuals with household hunger should be confirmed in longitudinal research that incorporates repeated measurements of households over time. A second limitation of our study is that cholera was self-reported because reliable medical records were not available to confirm cholera cases. Our study was limited to one region in Haiti, and future studies could investigate the generalizability of our findings by extending this work, including to other geographical regions where cholera is endemic or epidemic and where food insecurity is also high.

## Conclusion

As efforts are underway to eliminate cholera transmission and reduce cholera deaths by 2030, innovative public health approaches are needed to complement the backbone of water, sanitation, hygiene and vaccination programs. This analysis furthers our understanding of the relationship between food insecurity and the risk of developing cholera and provides a framework for putative longitudinal and qualitative studies to investigate whether interventions that target food insecurity could also reduce cholera risk among populations that face a high burden of both conditions. Cholera impacts the world's most impoverished communities, and inequity in access to basic human necessities such as water, sanitation, hygiene, and food are important components of the complex, intersectoral risk for ill-health.

## Acknowledgments

The authors express their sincere thanks to the study participants, the Ministry of Health and Population of Haiti, and the staff of Zanmi Lasante for their contributions to this work.

## Author Contributions

**Conceptualization:** Molly F. Franke, Louise C. Ivers.

**Data curation:** Yodeline Guillaume, Kenia Vissieres, Gertrude Cene Augustin, Ralph Ternier.

**Formal analysis:** Ahmed D. Elnaïem.

**Investigation:** Aaron Richterman, Yodeline Guillaume, Kenia Vissieres, Gertrude Cene Augustin, Ralph Ternier, Louise C. Ivers.

**Methodology:** Ahmed D. Elnaïem, Molly F. Franke, Aaron Richterman.

**Project administration:** Yodeline Guillaume, Kenia Vissieres, Gertrude Cene Augustin, Ralph Ternier, Louise C. Ivers.

**Resources:** Louise C. Ivers.

**Software:** Ahmed D. Elnaïem.

**Supervision:** Molly F. Franke, Louise C. Ivers.

**Validation:** Molly F. Franke, Yodeline Guillaume, Kenia Vissieres, Gertrude Cene Augustin, Ralph Ternier, Louise C. Ivers.

**Visualization:** Ahmed D. Elnaiem.

**Writing – original draft:** Ahmed D. Elnaiem, Louise C. Ivers.

**Writing – review & editing:** Ahmed D. Elnaiem, Molly F. Franke, Aaron Richterman, Yodeline Guillaume, Kenia Vissieres, Gertrude Cene Augustin, Ralph Ternier, Louise C. Ivers.

## References

1. About Cholera—Global Task Force on Cholera Control [Internet]. [cited 2022 Nov 14]. Available from: <https://www.gtfcc.org/about-cholera/>.
2. 9th-annual-meeting-gtfcc-2022-report.pdf [Internet]. [cited 2022 Nov 14]. Available from: <https://www.gtfcc.org/wp-content/uploads/2022/09/9th-annual-meeting-gtfcc-2022-report.pdf>.
3. Food and Agriculture Organization of the United Nations/World Food Program. Monitoring food security in countries with conflict situations. United Nations Security Council; 2020 Jan. Report No.: Issue No.7.
4. Weiser SD, Palar K, Hatcher AM, Young SL, Frongillo EA, Laraia BA. Food Insecurity and Health: A Conceptual Framework. In: Ivers LC, editor. Food insecurity and public health. Boca Raton: CRC Press, Taylor & Francis Group; 2015. p. 23–50.
5. Seligman HK, Laraia BA, Kushel MB. Food insecurity is associated with chronic disease among low-income NHANES participants. *J Nutr*. 2010 Feb; 140(2):304–10. <https://doi.org/10.3945/jn.109.112573> PMID: 20032485
6. Seligman HK, Schillinger D. Hunger and socioeconomic disparities in chronic disease. *N Engl J Med*. 2010 Jul; 363(1):6–9. <https://doi.org/10.1056/NEJMp1000072> PMID: 20592297
7. Seligman HK, Bindman AB, Vittinghoff E, Kanaya AM, Kushel MB. Food insecurity is associated with diabetes mellitus: results from the National Health Examination and Nutrition Examination Survey (NHANES) 1999–2002. *J Gen Intern Med*. 2007 Jul; 22(7):1018–23. <https://doi.org/10.1007/s11606-007-0192-6> PMID: 17436030
8. Tayie FA, Zizza CA. Food insecurity and dyslipidemia among adults in the United States. *Prev Med*. 2009 May; 48(5):480–5. <https://doi.org/10.1016/j.ypmed.2009.03.003> PMID: 19285104
9. Golovaty I, Tien PC, Price JC, Sheira L, Seligman H, Weiser SD. Food Insecurity May Be an Independent Risk Factor Associated with Nonalcoholic Fatty Liver Disease among Low-Income Adults in the United States. *J Nutr*. 2020 Jan; 150(1):91–8. <https://doi.org/10.1093/jn/nxz212> PMID: 31504710
10. Balinda IG, Sugrue DD, Ivers LC. More Than Malnutrition: A Review of the Relationship Between Food Insecurity and Tuberculosis. *Open Forum Infect Dis*. 2019 Mar 7; 6(4):ofz102.
11. Myers CA, Martin CK, Newton RL Jr, Apolzan JW, Arnold CL, Davis TC, et al. Cardiovascular Health, Adiposity, and Food Insecurity in an Underserved Population. *Nutrients*. 2019 Jun; 11(6).
12. Ford ES. Food security and cardiovascular disease risk among adults in the United States: findings from the National Health and Nutrition Examination Survey, 2003–2008. *Prev Chronic Dis*. 2013 Dec; 10:E202. <https://doi.org/10.5888/pcd10.130244> PMID: 24309090
13. Arenas DJ, Thomas A, Wang J, DeLisser HM. A Systematic Review and Meta-analysis of Depression, Anxiety, and Sleep Disorders in US Adults with Food Insecurity. *J Gen Intern Med*. 2019 Dec; 34(12):2874–82. <https://doi.org/10.1007/s11606-019-05202-4> PMID: 31385212
14. Jones AD. Food Insecurity and Mental Health Status: A Global Analysis of 149 Countries. *Am J Prev Med*. 2017 Aug; 53(2):264–73. <https://doi.org/10.1016/j.amepre.2017.04.008> PMID: 28457747
15. Richterman A, Franke MF, Constant G, Jerome G, Ternier R, Ivers LC. Food insecurity and self-reported cholera in Haitian households: An analysis of the 2012 Demographic and Health Survey. *PLoS Negl Trop Dis*. 2019 Jan; 13(1):e0007134. <https://doi.org/10.1371/journal.pntd.0007134> PMID: 30699107
16. Richterman A, Cheung HC, Meiselbach MK, Jerome G, Ternier R, Ivers LC. Risk Factors for Self-Reported Cholera Within HIV-Affected Households in Rural Haiti. *Open Forum Infect Dis*. 2018 Jun; 5(6):ofy127. <https://doi.org/10.1093/ofid/ofy127> PMID: 29942825
17. Richterman A, Azman AS, Constant G, Ivers LC. The inverse relationship between national food security and annual cholera incidence: a 30-country analysis. *BMJ Glob Health*. 2019 Sep; 4(5):e001755. <https://doi.org/10.1136/bmjgh-2019-001755> PMID: 31637028

18. Palmer DL, Koster FT, Alam AKMJ, Islam MR. Nutritional Status: A Determinant of Severity of Diarrhea in Patients with Cholera. *J Infect Dis*. 1976 Jul 1; 134(1):8–14.
19. Ververs M, Narra R. Treating cholera in severely malnourished children in the Horn of Africa and Yemen. *The Lancet*. 2017 Oct 28; 390(10106):1945–6. [https://doi.org/10.1016/S0140-6736\(17\)32601-6](https://doi.org/10.1016/S0140-6736(17)32601-6) PMID: 28988791
20. Ferdous F, Das SK, Ahmed S, Farzana FD, Latham JR, Chisti MJ, et al. Severity of Diarrhea and Malnutrition among Under Five-Year-Old Children in Rural Bangladesh. *Am J Trop Med Hyg*. 2013 Aug 7; 89(2):223–8. <https://doi.org/10.4269/ajtmh.12-0743> PMID: 23817334
21. Myers CA. Food Insecurity and Psychological Distress: a Review of the Recent Literature. *Curr Nutr Rep*. 2020 Apr; <https://doi.org/10.1007/s13668-020-00309-1> PMID: 32240534
22. Charnley GEC, Kelman I, Murray KA. Drought-related cholera outbreaks in Africa and the implications for climate change: a narrative review. *Pathog Glob Health*. 2022 Feb; 116(1):3–12. <https://doi.org/10.1080/20477724.2021.1981716> PMID: 34602024
23. Tauxe RV, Holmberg SD, Dodin A, Wells JV, Blake PA. Epidemic cholera in Mali: high mortality and multiple routes of transmission in a famine area. *Epidemiol Infect*. 1988 Apr; 100(2):279–89. <https://doi.org/10.1017/S0950268800067418> PMID: 3356224
24. Cummings MJ, Wamala JF, Eyura M, Malimbo M, Omeke ME, Mayer D, et al. A cholera outbreak among semi-nomadic pastoralists in northeastern Uganda: epidemiology and interventions. *Epidemiol Infect*. 2012 Aug; 140(8):1376–85. <https://doi.org/10.1017/S0950268811001956> PMID: 21943798
25. Cuneo CN, Sollom R, Beyrer C. The Cholera Epidemic in Zimbabwe, 2008–2009. *Health Hum Rights*. 2017 Dec; 19(2):249–64.
26. A Mission to Stop Cholera in Haiti [Internet]. Partners In Health. Available from: <https://www.pih.org/article/mission-stop-cholera-haiti>.
27. Matias WR, Teng JE, Hilaire IJ, Harris JB, Franke MF, Ivers LC. Household and Individual Risk Factors for Cholera among Cholera Vaccine Recipients in Rural Haiti. *Am J Trop Med Hyg*. 2017 Aug; 97(2):436–42. <https://doi.org/10.4269/ajtmh.16-0407> PMID: 28722575
28. Deitchler M, Ballard T, Swindale A, Coates J. Introducing a simple measure of household hunger for cross-cultural use. *Wash DC Food Nutr Tech Assist II Proj AED*. 2011;
29. Schreiner M. Simple poverty scorecard® poverty-assessment tool Haiti [Internet]. 2016. Available from: [http://www.simplepovertyscorecard.com/HTI\\_2012\\_ENG.pdf](http://www.simplepovertyscorecard.com/HTI_2012_ENG.pdf).
30. Richterman A, Sainvilien DR, Eberly L, Ivers LC. Individual and Household Risk Factors for Symptomatic Cholera Infection: A Systematic Review and Meta-analysis. *J Infect Dis*. 2018 Oct; 218(suppl\_3): S154–64. <https://doi.org/10.1093/infdis/jiy444> PMID: 30137536
31. Aibana O, Franke MF, Teng JE, Hilaire J, Raymond M, Ivers LC. Cholera vaccination campaign contributes to improved knowledge regarding cholera and improved practice relevant to waterborne disease in rural Haiti. *PLoS Negl Trop Dis*. 2013 Nov; 7(11):e2576. <https://doi.org/10.1371/journal.pntd.0002576> PMID: 24278498
32. Methods | Joint Monitoring Program. [cited 2022 Nov 14]. Available from: <https://washdata.org/monitoring/methods>.
33. Kempson KM, Palmer Keenan D, Sadani PS, Ridlen S, Scotto Rosato N. Food management practices used by people with limited resources to maintain food sufficiency as reported by nutrition educators. *J Am Diet Assoc*. 2002 Dec; 102(12):1795–9. [https://doi.org/10.1016/S0002-8223\(02\)90385-8](https://doi.org/10.1016/S0002-8223(02)90385-8) PMID: 12487543
34. Hadley C, Crooks DL. Coping and the biosocial consequences of food insecurity in the 21st century. *Am J Phys Anthr*. 2012 Oct; 149 Suppl 55:72–94. <https://doi.org/10.1002/ajpa.22161> PMID: 23109261
35. Radimer KL, Olson CM, Campbell CC. Development of indicators to assess hunger. *J Nutr*. 1990 Nov; 120 Suppl 11(suppl\_11):1544–8. [https://doi.org/10.1093/jn/120.suppl\\_11.1544](https://doi.org/10.1093/jn/120.suppl_11.1544) PMID: 2243303
36. Kempson K, Keenan DP, Sadani PS, Adler A. Maintaining food sufficiency: Coping strategies identified by limited-resource individuals versus nutrition educators. *J Nutr Educ Behav*. 2003 Jul; 35(4):179–88. [https://doi.org/10.1016/S1499-4046\(06\)60332-1](https://doi.org/10.1016/S1499-4046(06)60332-1) PMID: 12859882
37. De Marco M, Thorburn S. The relationship between income and food insecurity among Oregon residents: does social support matter? *Public Health Nutr*. 2009 Nov; 12(11):2104–12. <https://doi.org/10.1017/S1368980009990243> PMID: 19519971
38. De Marco M, Thorburn S, Kue J. In a country as affluent as America, people should be eating: experiences with and perceptions of food insecurity among rural and urban Oregonians. *Qual Health Res*. 2009 Jul; 19(7):1010–24. <https://doi.org/10.1177/1049732309338868> PMID: 19556404
39. Evans CA, Gilman RH, Rabbani GH, Salazar G, Ali A. Gastric acid secretion and enteric infection in Bangladesh. *Trans R Soc Trop Med Hyg*. 1997 Nov; 91(6):681–5. [https://doi.org/10.1016/S0035-9203\(97\)90523-x](https://doi.org/10.1016/S0035-9203(97)90523-x) PMID: 9509179

40. Weigel MM, Armijos RX, Hall YP, Ramirez Y, Orozco R. The household food insecurity and health outcomes of U.S.-Mexico border migrant and seasonal farmworkers. *J Immigr Minor Health*. 2007 Jul; 9(3):157–69.
41. Weigel MM, Armijos RX, Racines M, Cevallos W, Castro NP. Association of Household Food Insecurity with the Mental and Physical Health of Low-Income Urban Ecuadorian Women with Children. *J Env Public Health*. 2016 Sep; 2016:5256084. <https://doi.org/10.1155/2016/5256084> PMID: 27752266
42. Alarcão V, Guiomar S, Oliveira A, Severo M, Correia D, Torres D, et al. Food insecurity and social determinants of health among immigrants and natives in Portugal. *Food Secur*. 2020 Jun; 12(3):579–89.
43. Louis YE, Cadet JR, Gustinvil R, Dieuveut D. H. Pylori Infection: A Silent Epidemic that Affects Disadvantaged Populations in Haiti. *Glob Health Annu Rev*. 2021;1(6).
44. Kiely SC, Grzybicki DM, Sepulveda A, Capitano M, Toborowsky EJ. Chronic abdominal complaints and *Helicobacter pylori* in a Haitian population. *J Health Care Poor Underserved*. 2004 May; 15(2):183–92. <https://doi.org/10.1353/hpu.2004.0026> PMID: 15253372
45. Talezadeh Shirazi S, Eftekhari MH, Ahmadi A, Mazloom Z, Fararouei M, Ranjbar Zahedani M. The relationship of food insecurity and quality of life with *Helicobacter pylori* infection. *J Nutr Food Secur*. 2020 May;
46. Poulos C, Riewpaiboon A, Stewart JF, Clemens J, Guh S, Agtini M, et al. Costs of illness due to endemic cholera. *Epidemiol Infect*. 2012 Mar; 140(3):500–9. <https://doi.org/10.1017/S0950268811000513> PMID: 21554781
47. Schaetti C, Weiss MG, Ali SM, Chagnat CL, Khatib AM, Reyburn R, et al. Costs of illness due to cholera, costs of immunization and cost-effectiveness of an oral cholera mass vaccination campaign in Zan-zibar. *PLoS Negl Trop Dis*. 2012 Oct; 6(10):e1844. <https://doi.org/10.1371/journal.pntd.0001844> PMID: 23056660
